# Supplementary material
Source: HighWire-hosted journal article supplement (https://erj.ersjournals.com/content/56/1/2002104)
Supplement: inline-supplementary-material-1 [file inline-supplementary-material-1.pdf]

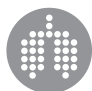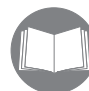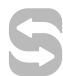

SHAREABLE PDF

# Time for a change: anticipating the diagnosis and treatment of COPD

Alvar Agusti<sup>1,2</sup>, Bernardino Alcazar <sup>2,3</sup>, Borja Cosio <sup>2,4</sup>, Jose Maria Echave<sup>5</sup>, Rosa Faner<sup>2</sup>, Jose Luis Izquierdo<sup>6,7</sup>, Jose Maria Marin <sup>2,8</sup>, Juan Jose Soler-Cataluña<sup>9</sup> and Bartolome Celli <sup>10</sup>, on behalf of the Scientific Committee of the ANTES programme

**Affiliations:** <sup>1</sup>Respiratory Institute, Hospital Clinic, Univ. Barcelona, IDIBAPS, Barcelona, Spain. <sup>2</sup>Centro de Investigación Biomédica en Red Enfermedades Respiratorias (CIBERES), Madrid, Spain. <sup>3</sup>AIG de Medicina, Department of Respiratory Medicine, Hospital de Alta Resolución de Loja, Loja, Spain. <sup>4</sup>Hospital Universitario Son Espases, Universitat de les Illes Balears, Palma de Mallorca, Spain. <sup>5</sup>Hospital Universitario Quirónsalud Madrid, Madrid, Spain. <sup>6</sup>Departamento de Medicina y Especialidades, Universidad de Alcalá, Madrid, Spain. <sup>7</sup>Servicio de Neumología, Hospital Universitario de Guadalajara, Guadalajara, Spain. <sup>8</sup>Hospital Miguel Servet, University of Zaragoza and IIS Aragón, Zaragoza, Spain. <sup>9</sup>Department of Respiratory Medicine, Hospital Arnau de Vilanova-Llíria, Valencia, Spain. <sup>10</sup>Harvard Medical School, Boston, MA, USA.

**Correspondence:** Alvar Agusti, Respiratory Institute, Hospital Clinic, Villarroel 170, 08036 Barcelona, Spain. E-mail: aagusti@clinic.cat

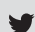

@ERSpublications

**COPD is often not diagnosed, or is diagnosed too late. It is time for a change that anticipates both diagnosis and treatment.** <https://bit.ly/2BrDSv1>

**Cite this article as:** Agusti A, Alcazar B, Cosio B, *et al.* Time for a change: anticipating the diagnosis and treatment of COPD. *Eur Respir J* 2020; 56: 2002104 [<https://doi.org/10.1183/13993003.02104-2020>].

This single-page version can be shared freely online.

COPD is a major public health problem because of its high prevalence (about 10% of the adult population), rising incidence (likely related to the ageing of the population), associated morbi-mortality (it is currently the third leading cause of death globally), and personal, social and economic costs [1]. The traditional way to address this problem has been to reduce smoking exposure, the main environmental risk factor for COPD [1]. Although this was, is and will be, a key public-health strategy, we argue here that it is not enough. If we want to eradicate COPD [2], it is time for a change that anticipates the diagnosis and treatment of the disease.
